# Supplementary material for: Application of area scaling analysis to identify natural killer cell and monocyte involvement in the GranToxiLux antibody dependent cell‐mediated cytotoxicity assay
Source: PubMed Central journal article supplement (PMC5969088; doi:10.1002/cyto.a.23348), 2018-03-02
Supplement: CYTO-93-436-s001.pdf [file CYTO-93-436-s001.pdf]

**Cytometry Part A**  
**Author Checklist: MIFlowCyt-Compliant Items**

| <b>Requirement</b>                                     | <b>Please Include Requested Information</b>                                                                                                                                                                                                                                                                                                                                                                                                       |
|--------------------------------------------------------|---------------------------------------------------------------------------------------------------------------------------------------------------------------------------------------------------------------------------------------------------------------------------------------------------------------------------------------------------------------------------------------------------------------------------------------------------|
| 1.1. Purpose                                           | Modification of the GranToxiLux ADCC assay to include Area Scaling Analysis (ASA) for qualitative assessment of antibody recruitment of NK cells and monocytes                                                                                                                                                                                                                                                                                    |
| 1.2. Keywords                                          | ADCC, Granzyme B, natural killer (NK cells), monocytes                                                                                                                                                                                                                                                                                                                                                                                            |
| 1.3. Experiment variables                              | Experiment variables described in the materials and methods and results section of the manuscript.                                                                                                                                                                                                                                                                                                                                                |
| 1.4. Organization name and address                     | Most experiments performed at: Duke University School of Medicine, Durham, NC 27710.<br><br>Flow sorting experiments performed at: Institute of Human Virology, University of Maryland School of Medicine, 725 West Lombard Street, Baltimore, MD 21201                                                                                                                                                                                           |
| 1.5. Primary contact name and email address            | Justin Pollara: justin.pollara@duke.edu (Duke University School of Medicine) or, Chiara Orlandi: COrlandi@ihv.umaryland.edu (IHV)                                                                                                                                                                                                                                                                                                                 |
| 1.6. Date or time period of experiment                 | 08/2014 – 09/2017                                                                                                                                                                                                                                                                                                                                                                                                                                 |
| 1.7. Conclusions                                       | The inclusion of area scaling analysis (ASA) in the GranToxiLux ADCC assay allows simultaneous quantification of ADCC activity at the target cell level, and assessment of the contribution of natural killer cells and monocytes to the total observed ADCC activity when whole human peripheral blood mononuclear cells are used as a source of effector cells.                                                                                 |
| 1.8. Quality control measures                          | The Duke Cytometer has been optimized and maintained according the procedures described by Perfetto and colleagues (Perfetto SP, Ambrozak D, Nguyen R, Chattopadhyay PK, Roederer M. Quality assurance for polychromatic flow cytometry using a suite of calibration beads. Nat Protoc 2012;7:2067-79.) In addition, both the Duke Cytometer and the IHV cell sorter are evaluated daily using Cytometer Setup & Tracking Beads – BD Biosciences. |
| 2.1.1.1. (2.1.2.1., 2.1.3.1.) Sample description       | Human plasma samples and human monoclonal antibodies used for this study are described in the Materials and Methods and Figure Legends.                                                                                                                                                                                                                                                                                                           |
| 2.1.1.2. Biological sample source description          | Human T cell line (CEM.NKR <sub>CCRS</sub> ) and human PBMC; details in Materials and Methods                                                                                                                                                                                                                                                                                                                                                     |
| 2.1.1.3. Biological sample source organism description | Human origin cell lines and primary cells from blood.                                                                                                                                                                                                                                                                                                                                                                                             |
| 2.1.2.2. Environmental sample location                 | -80°C storage for plasma/mAb samples, PBMC stored in LN2                                                                                                                                                                                                                                                                                                                                                                                          |
| 2.3. Sample treatment description                      | Detailed descriptions are in the Material and Methods section of the manuscript                                                                                                                                                                                                                                                                                                                                                                   |
| 2.4. Fluorescence reagent(s) description               | Fluorescent reagents are described in the Materials and Methods section of the manuscript                                                                                                                                                                                                                                                                                                                                                         |

3.1. Instrument manufacturer  
Becton Dickinson (BD)

3.2. Instrument model  
LSR Fortessa (Duke University) and FACS Aria II cell sorter (IHV)

3.3. Instrument configuration and settings  
**Duke BD Fortessa:**

|                         |                        |
|-------------------------|------------------------|
| Cytometer Configuration |                        |
| Software Version        | BD FACSDiva 8.0.1      |
| Export Time             | 7/24/17 9:52           |
| User                    |                        |
| Cytometer               | LSRFortessa            |
| Serial Number           | H64779400025           |
| Configuration Name      | F230                   |
| Folder Name             | Current Configurations |
| Comments                |                        |
| Window Extension        | 10                     |

| Laser Name       | Type   | Wavelength | Power | Detector Array | Detector | Channel | Mirror | Filter    | Parameter       | Fsc Channel | Reference | Position |
|------------------|--------|------------|-------|----------------|----------|---------|--------|-----------|-----------------|-------------|-----------|----------|
| Red              | Red    | 640        | 40    | Trigon         | A        | 14      | 750 LP | 780/60 BP | APC-Cy7         |             |           | 3        |
|                  |        |            |       |                | B        | 13      | 685 LP | 730/45 BP | Alexa Fluor 700 |             |           |          |
|                  |        |            |       |                | C        | 12      |        | 660/20 BP | APC             |             |           |          |
| Blue             | Blue   | 488        | 50    | Trigon         | A        | 3       | 685 LP | 710/50 BP | PerCP-Cy5-5     | 0 Y         |           | 1        |
|                  |        |            |       |                | B        | 2       | 505 LP | 530/30 BP | FITC            |             |           |          |
|                  |        |            |       |                | C        | 1       |        | 488/10 BP | SSC             |             |           |          |
| Violet           | Custom | 405        | 50    | Octagon        | A        | 6       | 750 LP | 780/60 BP | BV786           |             |           | 2        |
|                  |        |            |       |                | B        | 5       | 735 LP | 740/35 BP | BV745           |             |           |          |
|                  |        |            |       |                | C        | 4       | 690 LP | 710/50 BP | BV711           |             |           |          |
|                  |        |            |       |                | D        | 15      | 630 LP | 660/20 BP | BV650           |             |           |          |
|                  |        |            |       |                | E        | 16      | 600 LP | 610/20 BP | BV605           |             |           |          |
|                  |        |            |       |                | F        | 17      | 550 LP | 585/15 BP | BV570           |             |           |          |
|                  |        |            |       |                | G        | 18      | 505 LP | 525/50 BP | BV510           |             |           |          |
|                  |        |            |       |                | H        | 19      |        | 450/50 BP | BV421           |             |           |          |
| 561 Yellow-Green | Custom | 561        | 50    | Octagon        | A        | 11      | 750 LP | 780/60 BP | PE-Cy7          |             |           | 4        |
|                  |        |            |       |                | B        | 10      | 685 LP | 710/50 BP | PE-Cy5-5        |             |           |          |
|                  |        |            |       |                | C        | 9       | 635 LP | 660/20 BP | PE-Cy5          |             |           |          |
|                  |        |            |       |                | D        | 8       | 600 LP | 610/20 BP | PE-Texas Red    |             |           |          |
|                  |        |            |       |                | E        | 7       |        | 582/15 BP | PE              |             |           |          |

**IHV BD FACS Aria II Sorter:**

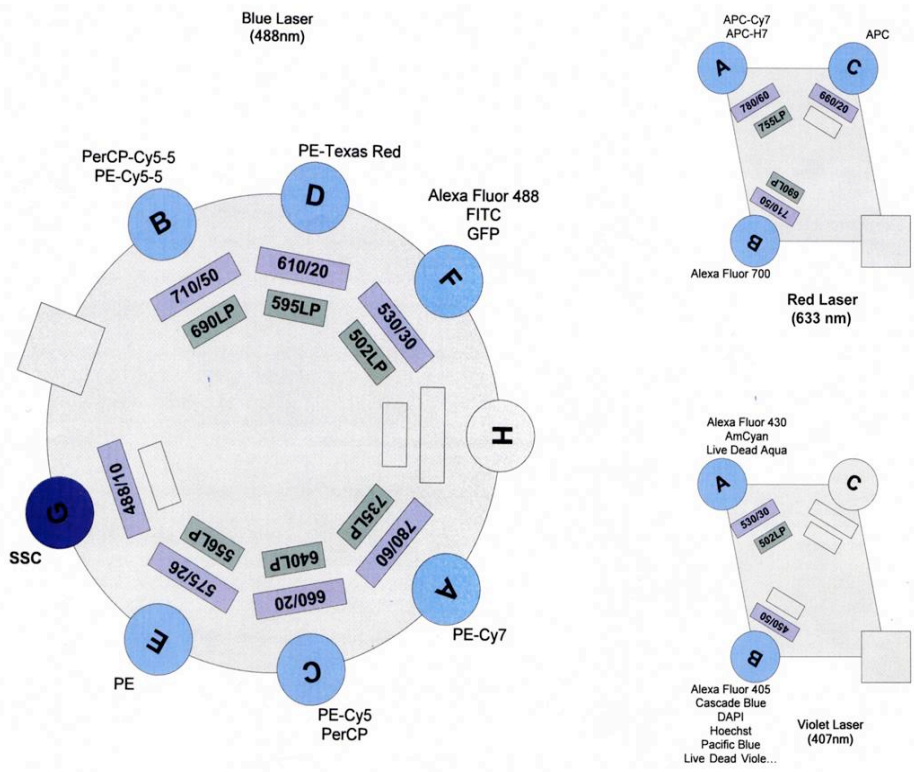

|                                  |                                                                                                                                                                                                                                                                                                                                                                                                                                                                                                  |
|----------------------------------|--------------------------------------------------------------------------------------------------------------------------------------------------------------------------------------------------------------------------------------------------------------------------------------------------------------------------------------------------------------------------------------------------------------------------------------------------------------------------------------------------|
| 4.1. List-mode data files        | <p>The repository identifier:</p> <p><a href="http://flowrepository.org/id/FR-FCM-ZYD5">http://flowrepository.org/id/FR-FCM-ZYD5</a></p>                                                                                                                                                                                                                                                                                                                                                         |
| 4.2. Compensation description    | <p>Anti-Mouse Ig, <math>\kappa</math>/Negative Control Compensation Particles Set (BD Biosciences cat. 552843) used for conjugated fluorescent mAbs. TFL4 compensation used TFL4-stained CEM.NKR<sub>CCR5</sub> cells for positive compensation controls. NFL1 compensation used NFL1 stained permeabilized and fixed CEM.NKR<sub>CCR5</sub> cells for positive compensation controls. Unstained CEM.NKR<sub>CCR5</sub> cells were used as negative compensation controls for TFL4 and NFL1.</p> |
| 4.3. Data transformation details | <p>Log transformation of fluorescence channels, lin transformation of scatter characteristics (FlowJo Software v9/9.4)</p>                                                                                                                                                                                                                                                                                                                                                                       |
| 4.4.1. Gate description          | <p>Gating strategies and boundaries are indicated in Figures presented in the manuscript.</p>                                                                                                                                                                                                                                                                                                                                                                                                    |
| 4.4.2. Gate statistics           | <p>Frequency of Parent/gate, Median Fluorescent Intensity</p>                                                                                                                                                                                                                                                                                                                                                                                                                                    |
| 4.4.3. Gate boundaries           | <p>Gating strategies and boundaries are indicated in Figures presented in the manuscript.</p>                                                                                                                                                                                                                                                                                                                                                                                                    |
